# Supplementary material
Source: PubMed Central journal article supplement (PMC3661755)
Supplement: NIHMS462242-supplement-01.pdf [file NIHMS462242-supplement-01.pdf]

# **Sensing lectin-glycan interactions using lectin super-microarrays and glycans labeled with dye-doped silica nanoparticles**

Xin Wang,<sup>a</sup> Elena Matei,<sup>b</sup> Lingquan Deng,<sup>c</sup> Leonardus Koharudin,<sup>b</sup> Angela M. Gronenborn,<sup>b\*</sup>  
Olof Ramström,<sup>c\*</sup> and Mingdi Yan<sup>a,c,d\*</sup>

<sup>a</sup> *Department of Chemistry, Portland State University, P.O. Box 751, Portland, Oregon, 97207-0751;*

<sup>b</sup> *Department of Structural Biology, University of Pittsburgh Medical School, Pittsburgh, PA 15260;*

<sup>c</sup> *Department of Chemistry, KTH - Royal Institute of Technology, Teknikringen 30, S-10044 Stockholm, Sweden;*

<sup>d</sup> *Department of Chemistry, University of Massachusetts Lowell, 1 University Ave., Lowell, MA 01854*

## Table of contents:

|                                                                         |    |
|-------------------------------------------------------------------------|----|
| 1. Synthesis and characterization of FITC-doped silica nanoparticles    | S2 |
| 2. AFM images of lectin microarray spot after incubation with FSNP-Man2 | S4 |
| 3. Lectins and their corresponding glycan specificities                 | S5 |
| 4. Glycan densities of FSNP-glycans                                     | S6 |
| 5. Association constants ( $K_a$ ) of lectins and glycans               | S7 |
| 6. References                                                           | S8 |

## 1. Synthesis and characterization of FITC-doped silica nanoparticles (FSNPs)

The FITC-doped silica nanoparticles were synthesized following a modified Stöber protocol (**Scheme S1**).<sup>1,2</sup> The FITC-silane precursor was synthesized by mixing fluorescein isothiocyanate (39 mg, 0.10 mmol, Sigma-Aldrich) with APTMS (23  $\mu\text{L}$ , 0.10 mmol) in absolute ethanol (100 mL), and the solution was stirred at 42 °C for 24 h. The resulting FITC-silane solution (5 mL) was then mixed with TEOS (2.8 mL), and the mixture was added to a solution of  $\text{NH}_4\text{OH}$  (25%, 2.8 mL) in absolute ethanol (34 mL). A bright yellow colloidal solution was obtained after the reaction mixture was stirred vigorously overnight at room temperature. The resulting FSNPs were characterized by transmission electron microscopy (TEM) and dynamic light scattering (DLS) (**Fig. S1**).

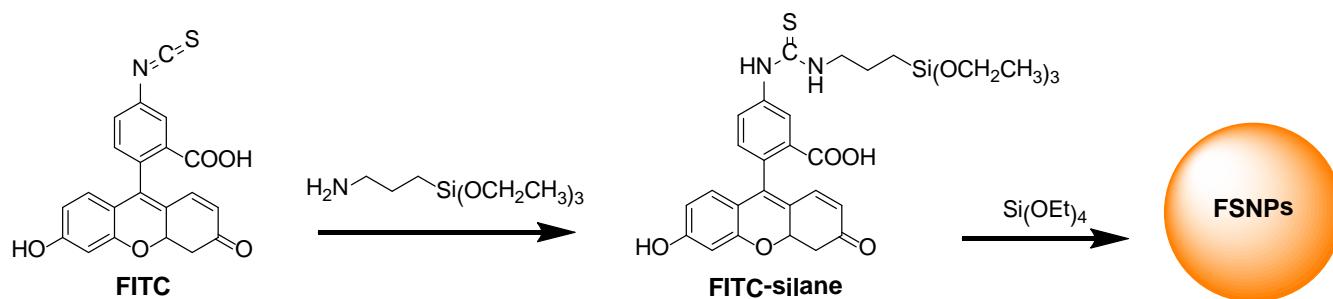

**Scheme S1.** Synthesis of FSNPs.

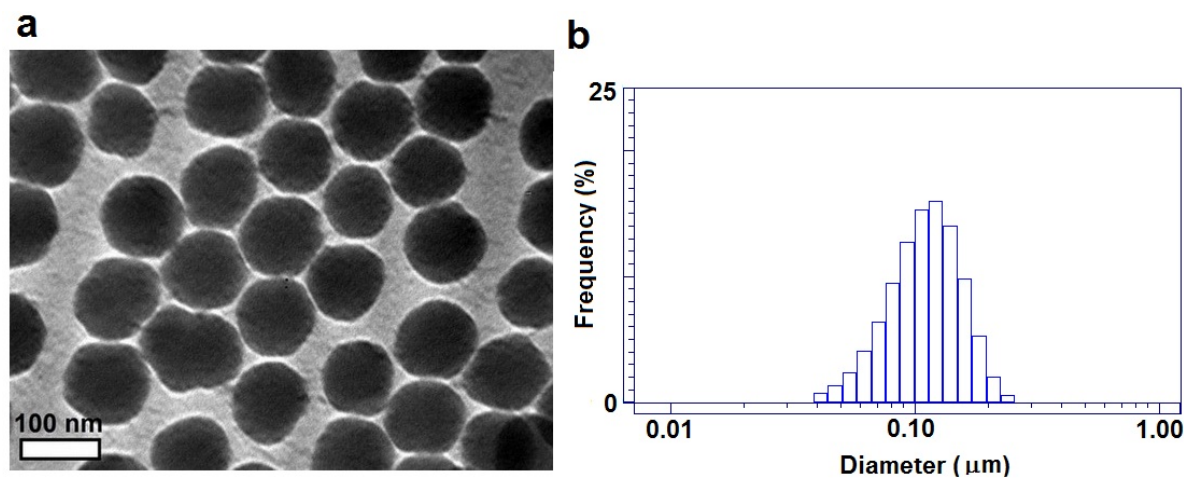

**Figure S1.** (a) TEM image and (b) DLS particle size distribution of FSNPs.

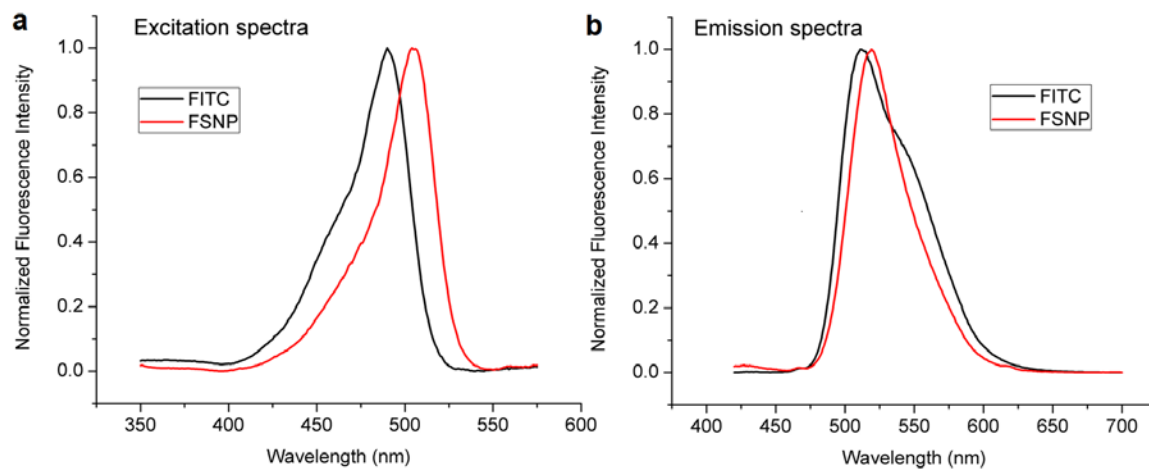

**Figure S2.** Fluorescence spectra of FITC (black) and FSNPs (red): (a) excitation and (b) emission.

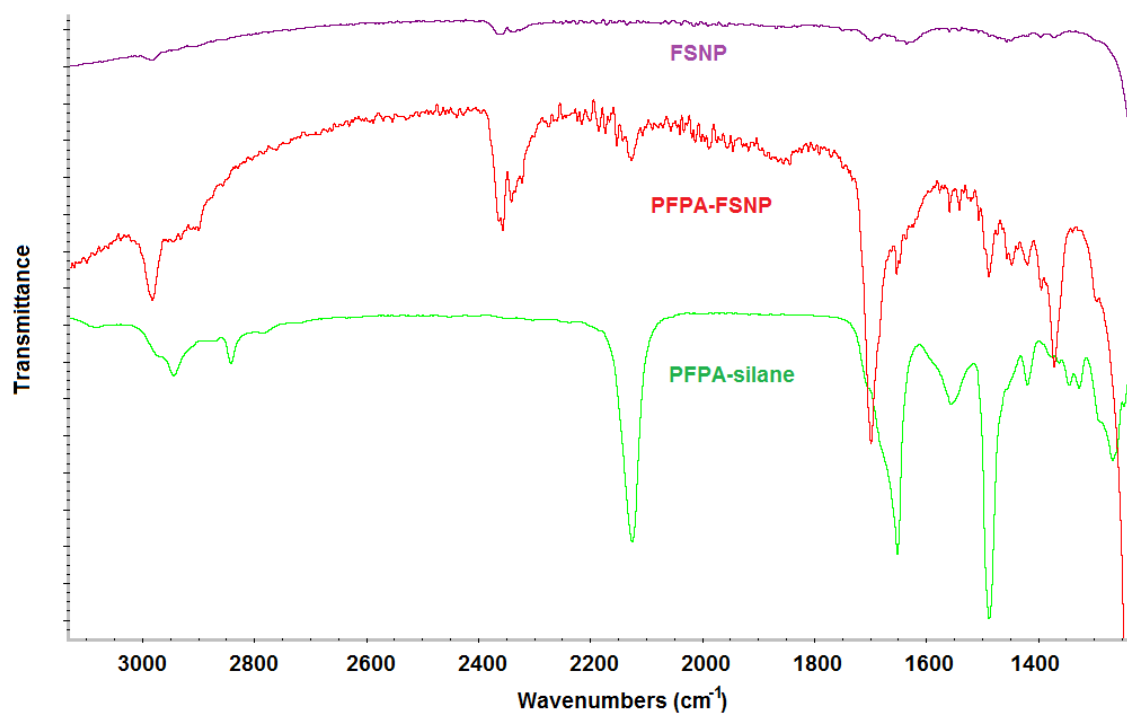

**Figure S3.** FTIR spectra of FSNPs (purple), PFPA-silane (green) and PFPA-functionalized FSNPs (red).

2. AFM images of lectin microarray spot after incubation with FSNP-Man2

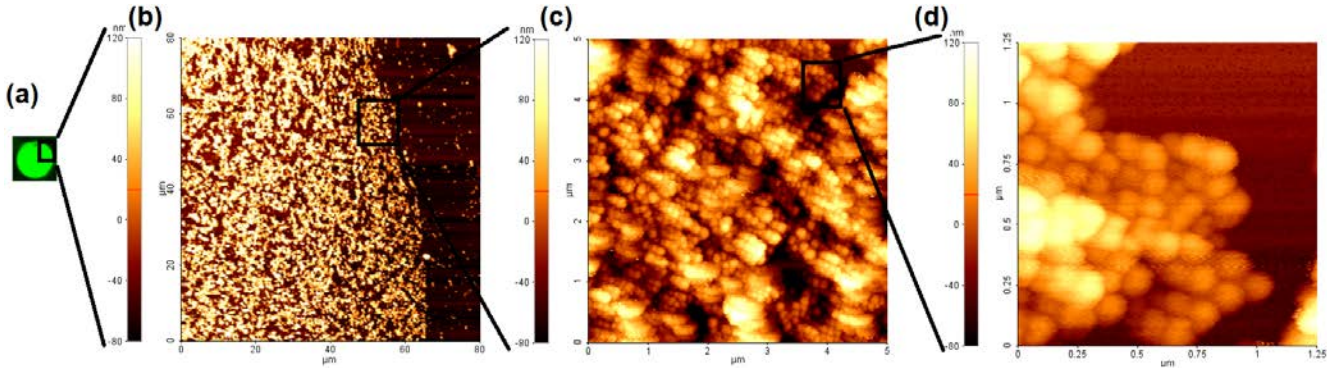

**Figure S4.** Fluorescence (a) and AFM images (b-d) of a Con A spot after incubating with FSNP-Man2 (1.5 mg/mL) for 2 h. The concentration of the Con A printing solution was 1 mg/mL.

### 3. Lectins and their corresponding carbohydrate binding ligands

**Table S1.** Lectins and their corresponding carbohydrate binding ligands.

| Lectin               |                                         | Origin                                      | Glycan specificity           |
|----------------------|-----------------------------------------|---------------------------------------------|------------------------------|
| CVN <sup>Q50C</sup>  | Cyanovirin-N mutant                     | <i>Cyanobacteria</i>                        | Man( $\alpha$ 1,2)Man        |
| CVN <sup>MutDB</sup> | Cyanovirin-N mutant                     | <i>Cyanobacteria</i>                        | Man( $\alpha$ 1,2)Man        |
| SBA                  | Soybean Agglutinin                      | <i>Glycine max</i> (soybean)                | GalNAc                       |
| Con A                | Concanavalin A                          | <i>Canavaliaensiformis</i>                  | Man                          |
| PNA                  | Peanut Agglutinin                       | <i>Arachishypogaea</i> (peanut)             | Gal( $\beta$ 1,3)GalNAc /Gal |
| BS-I                 | <i>Bandeiraeasimplicifolia</i> lectin I | <i>Griffonia (Bandeiraea) simplicifolia</i> | GalNAc/Gal                   |
| OAA                  | <i>Oscillatoriaagardhii</i> Agglutinin  | <i>Cyanobacteria</i>                        | Man( $\alpha$ 1,6)Man        |
| PFA                  | Homolog of OAA                          | N/A                                         | Man( $\alpha$ 1,6)Man        |
| W77                  | Mutant of OAA                           | <i>Cyanobacteria</i>                        | Man( $\alpha$ 1,6)Man        |
| DBA                  | <i>Dolichosbiflorus</i> Agglutinin      | <i>Dolichosbiflorus</i> (horse gram)        | GalNAc                       |
| UEA                  | <i>Ulexeuropaeus</i> Agglutinin I       | <i>Ulexeuropaeus</i> (Furze gorse)          | Fuc                          |
| WGA                  | Wheat Germ Agglutinin                   | <i>Triticum vulgare</i> (wheat germ)        | GlcNAc                       |
| RCA-I                | <i>Ricinuscommunis</i> Agglutinin I     | <i>Ricinuscommunis</i> (castor bean)        | Gal/GalNAc/Lac               |

#### 4. Glycan densities of FSNP-glycans

**Table S2.** Glycan densities on FSNP-glycans

| <b>Glycan</b>                | <b>Number of glycan per FSNP (<math>\times 10^4</math>)</b> |
|------------------------------|-------------------------------------------------------------|
| Man                          | 5.5                                                         |
| Glc                          | 5.4                                                         |
| Gal                          | 5.4                                                         |
| GlcNAc                       | 5.8                                                         |
| GlcNAc                       | 5.7                                                         |
| Fuc                          | 5.4                                                         |
| 2 $\alpha$ -Man2             | 2.9                                                         |
| 6 $\alpha$ -Man2             | 3.0                                                         |
| 2 $\alpha$ ,2 $\alpha$ -Man3 | 2.4                                                         |
| 3 $\alpha$ ,6 $\alpha$ -Man3 | 2.3                                                         |

## 5. Association constants ( $K_a$ ) of lectins and glycans

**Table S3.** Reported association constants ( $K_a$ ) of lectin-glycan pairs.

| Lectin                | Glycan                       | $K_a$ ( $M^{-1}$ )                                             |
|-----------------------|------------------------------|----------------------------------------------------------------|
| CVN <sup>Q50C 3</sup> | 2 $\alpha$ -Man2             | 1.43 $\times 10^3$ (Domain A)<br>1.56 $\times 10^4$ (Domain B) |
|                       | 2 $\alpha$ ,2 $\alpha$ -Man3 | 2.94 $\times 10^5$ (Domain A)<br>2.33 $\times 10^4$ (Domain B) |
| CVN <sup>MutDB4</sup> | 2 $\alpha$ -Man2             | 1.32 $\times 10^3$                                             |
|                       | 2 $\alpha$ ,2 $\alpha$ -Man3 | 2.94 $\times 10^5$                                             |
| Con A <sup>5</sup>    | Man                          | 8.2 $\times 10^3$                                              |
|                       | 2 $\alpha$ -Man2             | 4.17 $\times 10^4$                                             |
|                       | 2 $\alpha$ ,2 $\alpha$ -Man3 | 3.79 $\times 10^5$                                             |
|                       | Glc                          | 1.96 $\times 10^3$                                             |
| SBA <sup>6</sup>      | GalNAc                       | 1.51 $\times 10^6$                                             |
| PNA <sup>7</sup>      | Gal                          | 0.98 $\times 10^3$                                             |
|                       | GalNAc                       | 2.43 $\times 10^3$                                             |
| BS-I <sup>8</sup>     | Gal                          | 2.1 $\times 10^4$                                              |
|                       | GalNAc                       | 1.87 $\times 10^5$                                             |
| DBA <sup>9</sup>      | GalNAc                       | 4.2 $\times 10^3$                                              |
| WGA <sup>10</sup>     | GlcNAc                       | 0.4 $\times 10^3$                                              |
| RCA-I <sup>11</sup>   | Gal                          | 2.2 $\times 10^3$                                              |
|                       | GalNAc                       | 4.84 $\times 10^4$                                             |

## 6. References

- (1) Stöber, W.; Fink, A. *J. Colloid Interface Sci.* **1968**, *26*, 62-69.
- (2) Gann, J. P.; Yan, M. *Langmuir* **2008**, *24*, 5319-5323.
- (3) Wang, X.; Matei, E.; Deng, L.; Ramström, O.; Gronenborn, A. M.; Yan, M. *Chem. Commun.* **2011**, *47*, 8620-8622.
- (4) Matei, E.; Furey, W.; Gronenborn, A. M. *Structure* **2008**, *16*, 1183-1194.
- (5) Mandal, D. K.; Kishore, N.; Brewer, C. F. *Biochemistry (Mosc)*. **1994**, *33*, 1149-1156.
- (6) Khan, M. I.; Swamy, M. J.; Sastry, M. V. K.; Sajjan, S. U.; Patanjali, S. R.; Rao, P.; Swarnalatha, G. V.; Banerjee, P.; Surolia, A. *Glycoconjugate J.* **1988**, *5*, 75-84.
- (7) De Boeck, H.; Lis, H.; van Tilbeurgh, H.; Sharon, N.; Loontjens, F. G. *J. Biol. Chem.* **1984**, *259*, 7067-7074.
- (8) Lee, Y. C. *J. Biochem.* **1997**, *121*, 818-825.
- (9) Etzler, M.; Gupta, S.; Borrebaeck, C. *J. Biol. Chem.* **1981**, *256*, 2367-2370.
- (10) Bains, G.; Lee, R. T.; Lee, Y. C.; Freire, E. *Biochemistry (Mosc)*. **1992**, *31*, 12624-12628.
- (11) Sharma, S.; Bharadwaj, S.; Surolia, A.; Podder, S. K. *Biochem. J* **1998**, *333*, 539-542.
